# Supplementary material for: Comprehensive Expression Analyses of Plastidial Thioredoxins of Arabidopsis thaliana Indicate a Main Role of Thioredoxin m2 in Roots
Source: MDPI journal article supplement (doi:10.3390/antiox11071365), 2022-07-14
Supplement: s1 [file s1]

**Table S1.** Oligonucleotides used for Arabidopsis TRXs cloning.

| Gene         | Accession Number | Oligo Name | Sequence                                      | Cloning |
|--------------|------------------|------------|-----------------------------------------------|---------|
| <i>TRXf1</i> | At3g02730        | f1ENT5PROM | CACCACTGTCTCCGCCTGAG                          | pGWB4   |
|              |                  | f1ENT3     | TCCTCCGGAAGCAGCAGAC                           |         |
|              |                  | 5Atf1N     | GGGGCATATGGTTGGTCAGGTGACGGAGGT                | pET28b  |
|              |                  | 3Atf1B     | GGGGGGATCCTCATCCGGAAGCAGCAGACCTCG             |         |
| <i>TRXf2</i> | At5g16400        | f2ENT5PROM | CACCAAACCTCGAGTCTTTCAGTGC                     | pGWB4   |
|              |                  | f2ENT3     | TCCGCCTGACCTTGCTGCTTC                         |         |
|              |                  | 5Atf2N     | GGGGCATATGGTTGGCCAGGTGACGGAGGT                | pET28b  |
|              |                  | 3Atf2B     | GGGGGGATCCTCAGCCTGACCTTGCTGCTTCAA             |         |
| <i>TRXm1</i> | At1g03680        | m1ENT5PROM | CACCCCTGTGATAGTTGTACACAAG                     | pGWB4   |
|              |                  | m1ENT3     | CAAGAAATTTGTTGATGCTGGTTGC                     |         |
|              |                  | 5Atm1N     | GGGGCATATGCACACTGCTACAGGAATTCCAGTGG           | pET28b  |
|              |                  | 3Atm1B     | GGGGGGATCCTCATTACAAGAATTTGTTGATGCTGG          |         |
| <i>TRXm2</i> | At4g03520        | m2ENT5PROM | CACCCAGCGAGCTAAAGTGACATC                      | pGWB4   |
|              |                  | m2ENT3     | TGGCAAGAACTTGTCGAGGC                          |         |
|              |                  | 5Atm2N     | GGGGCATATGGAACTACTACCGATATTCAAGTGGTCA         | pET28b  |
|              |                  | 3Atm2B     | ATGA<br>GGGGGGATCCCGAGATCTTACAGACTCCAC        |         |
| <i>TRXm3</i> | At2g15570        | m3ENT5PROM | CACCGTCCAATAATTTCCCCACGGAG                    | pGWB4   |
|              |                  | m3ENT3     | TGAGTTCAAGACTCTTTCAATGGCG                     |         |
|              |                  | 5Atm3N     | GGGGCATATGGCTGAAGTTACACAACGATC                | pET28b  |
|              |                  | 3Atm3B     | GGGGGGATCCTCATGAGTTCAAGACTCTTTCAA             |         |
| <i>TRXm4</i> | At3g15360        | m4ENT5PROM | CACCGGAGAGAGTAGGGAAAATGGAG                    | pGWB4   |
|              |                  | m4ENT3     | CTCGACCAAGAATCTTTCTATAGTTTTCTCC               |         |
|              |                  | 5Atm4N     | GGGGCATATGGACACCACTGCCGCCGCCGT                | pET28b  |
|              |                  | 3Atm4B     | GGGGGGATCCTCACTCGACCAAGAATCTTTCTATAGTT<br>TCT |         |

For pGWB4 cloning, cDNAs were first cloned into the pENTR™ vector. Underlined sequences show restriction sites *Nde*I (CATATG) and *Bam*HI (GGATCC).
